# Supplementary material for: Genome-wide member identification, phylogeny and expression analysis of PEBP gene family in wheat and its progenitors
Source: PeerJ. 2020 Dec 15;8:e10483. doi: 10.7717/peerj.10483 (PMC7747686; doi:10.7717/peerj.10483)
Supplement: Supplemental Information 1 [file peerj-08-10483-s001.xls]

## Sheet: Supplementary Table S1
Table S1. List of primers used for TaPEBP genes expression analysis.
PEBP Name	Forward Primer (5'-3')	Reverse Primer (5'-3')
TaPEBP1	CACCGCATCCAGTTCCGT	CCTCCATGACCTTGTCCACTG
TaPEBP5	TTCTTGTGGATTTTGACACTCG	TACAGAACAGACCACACACAAT
TaPEBP9	TAGACCCTGACGTACCTAGTC	CTCGTTCTGGTATGTCTGTGAC
TaPEBP28	AGAGGCAGAGCGAGAGAAAGAG	ACCGACGGCACGAACAAG
TaPEBP50	CTTGTGGTTTATGAAAGACCGG	TTGGCAGTTGAAATATGTAGCG
TaPEBP66	GGTGTAAGTGTGTGCATTAGTG	CAGCCGGTTTTCATGTATTCAT
TaPEBP69	ATCCATCTCTTGTCGTTGTCAT	CTAATGCACACACTTACATCCG
