# Supplementary material for: Genome-wide member identification, phylogeny and expression analysis of PEBP gene family in wheat and its progenitors
Source: PeerJ. 2020 Dec 15;8:e10483. doi: 10.7717/peerj.10483 (PMC7747686; doi:10.7717/peerj.10483)
Supplement: Supplemental Information 2 [file peerj-08-10483-s002.xls]

## Sheet: T. aestivum L.
Table S2. Characteristics features of PEBP genes in T. aestivum L.
PEBP Genes Name	Transcript ID	Strand	Location(v1.0)	Location(v2.0)	Length	Mw	pI	Instability index	Exon	Subcellular Localization
TaPEBP1	TraesCS1A02G295800.1	-	chr1A:490794344..490797100	chr1A:492331764..492334520	165	17.7579	4.84	42.71	3	Cytoplasmic
TaPEBP2	TraesCS1A02G338600.1	-	chr1A:528064927..528067271	chr1A:529729341..529731685	180	20.0108	7.9	47.21	4	Extracellular;Cytoplasmic
TaPEBP3	TraesCS1B02G304800.1	-	chr1B:527370862..527371626	chr1B:533953630..533954394	167	17.7939	4.93	39.57	3	Cytoplasmic
TaPEBP4	TraesCS1B02G351100.1	-	chr1B:581413459..581415020	chr1B:588466220..588467781	180	19.9807	7.88	47.56	4	Extracellular;Cytoplasmic
TaPEBP5	TraesCS1D02G296500.1	+	chr1D:394466710..394467566	chr1D:395448303..395449159	165	17.7438	4.84	42.71	2	Cytoplasmic
TaPEBP6	TraesCS1D02G340800.1	-	chr1D:430467890..430469335	chr1D:432848417..432849862	179	19.8816	7.9	45.21	4	Cytoplasmic
TaPEBP7	TraesCS2A02G132300.1	-	chr2A:79331208..79333477	chr2A:84018325..84020594	173	19.1528	8.85	55.63	4	Chloroplast;Extracellular
TaPEBP8	TraesCS2A02G347000.1	-	chr2A:585212351..585214312	chr2A:588988050..588990011	174	19.4401	8.93	40.82	4	Chloroplast
TaPEBP9	TraesCS2A02G485000.1	+	chr2A:719993376..719994507	chr2A:723858074..723859205	171	19.0415	7.67	44.28	4	Extracellular
TaPEBP10	TraesCS2A02G536600.1	-	chr2A:750581004..750582032	chr2A:754562642..754563670	173	19.2568	8.5	41.96	4	Cytoplasmic;Extracellular
TaPEBP11	TraesCS2A02G536700.1	-	chr2A:750617049..750618077	chr2A:754598448..754599476	173	19.2568	8.5	41.96	4	Cytoplasmic;Extracellular
TaPEBP12	TraesCS2A02G536900.1	+	chr2A:750744527..750745555	chr2A:754722635..754723663	173	19.2568	8.5	41.96	4	Cytoplasmic;Extracellular
TaPEBP13	TraesCS2B02G154800.1	-	chr2B:122754604..122756929	chr2B:130677279..130679604	173	19.1789	8.85	54.52	4	Extracellular;Chloroplast
TaPEBP14	TraesCS2B02G310700.1	-	chr2B:443823483..443825345	chr2B:452316971..452318833	173	19.6653	8.96	45.84	4	Cytoplasmic
TaPEBP15	TraesCS2B02G365300.1	-	chr2B:519184687..519186912	chr2B:527221987..527224212	174	19.422	8.93	39.46	4	Chloroplast
TaPEBP16	TraesCS2B02G511400.1	+	chr2B:707377351..707378238	chr2B:715847302..715848189	172	19.0505	6.72	46.57	4	Extracellular
TaPEBP17	TraesCS2B02G567200.1	-	chr2B:758147263..758150601	chr2B:766847361..766850699	173	19.5471	8.88	42.83	4	Cytoplasmic;Extracellular
TaPEBP18	TraesCS2B02G567400.1	-	chr2B:758389629..758390630	chr2B:767089375..767090376	173	19.414	8.5	40.46	4	Extracellular;Cytoplasmic
TaPEBP19	TraesCS2D02G134200.1	-	chr2D:79065822..79068169	chr2D:81443782..81446129	173	19.1658	8.85	50.63	4	Chloroplast;Extracellular
TaPEBP20	TraesCS2D02G292000.1	-	chr2D:373901774..373903547	chr2D:376287337..376289110	173	19.6503	8.96	43.79	4	Cytoplasmic
TaPEBP21	TraesCS2D02G345700.1	-	chr2D:441574002..441576219	chr2D:443919779..443921996	174	19.4261	8.93	38.97	4	Chloroplast
TaPEBP22	TraesCS2D02G485100.1	+	chr2D:585860388..585861249	chr2D:588863423..588864284	173	19.2707	6.72	49.35	4	Extracellular
TaPEBP23	TraesCS2D02G538000.1	-	chr2D:619426237..619427185	chr2D:622416897..622417845	152	17.0213	9.18	41.17	4	Extracellular;Cytoplasmic;Mitochondrial
TaPEBP24	TraesCS2D02G538100.1	-	chr2D:619436294..619437430	chr2D:622426548..622427684	173	19.3169	8.5	40.84	4	Cytoplasmic;Extracellular
TaPEBP25	TraesCS3A02G006600.1	+	chr3A:7294362..7297912	chr3A:7364274..7367658	175	19.3342	8.73	49.86	4	Mitochondrial
TaPEBP26	TraesCS3A02G013100.1	+	chr3A:9627936..9631402	chr3A:9698725..9702191	175	19.3038	6.3	41.43	4	Cytoplasmic
TaPEBP27	TraesCS3A02G143100.1	+	chr3A:124172881..124176487	chr3A:135530005..135533181	182	19.9448	6.72	38.28	4	Extracellular;Cytoplasmic
TaPEBP28	TraesCS3B02G007400.1	-	chr3B:3863692..3868727	chr3B:4440334..4445369	169	18.5043	6.51	50.63	4	Cytoplasmic;Extracellular
TaPEBP29	TraesCS3B02G010100.1	-	chr3B:4743748..4747536	chr3B:11385425..11389213	175	19.3162	8.6	49.72	4	Cytoplasmic
TaPEBP30	TraesCS3B02G015200.1	+	chr3B:6336915..6337852	chr3B:6470125..6471062	175	19.3469	6.12	41.62	4	Cytoplasmic
TaPEBP31	TraesCS3B02G015600.2	+	chr3B:6406013..6407183	chr3B:6539222..6540392	175	19.4901	7.72	45.39	4	Cytoplasmic;Extracellular
TaPEBP32	TraesCS3B02G015700.1	+	chr3B:6468576..6470121	chr3B:6601782..6603327	175	19.2747	6.07	43.35	4	Cytoplasmic
TaPEBP33	TraesCS3B02G015800.1	+	chr3B:6533011..6534111	chr3B:6668311..6669411	175	19.3389	5.92	41.73	4	Cytoplasmic;Extracellular
TaPEBP34	TraesCS3B02G162000.2	-	chr3B:158715454..158719538	chr3B:170465205..170469289	180	19.8247	6.82	38.94	4	Cytoplasmic;Extracellular
TaPEBP35	TraesCS3D02G004100.1	-	chr3D:1733084..1736612	chr3D:2162984..2166512	194	21.745	9.44	51.91	4	Mitochondrial;Cytoplasmic;Nuclear
TaPEBP36	TraesCS3D02G011500.1	+	chr3D:4111863..4112845	chr3D:4098128..4099110	175	19.3629	7.73	44.55	4	Cytoplasmic
TaPEBP37	TraesCS3D02G011600.1	+	chr3D:4134343..4135412	chr3D:4120626..4121695	175	22.3173	7.01	43.74	4	Cytoplasmic
TaPEBP38	TraesCS3D02G011700.1	+	chr3D:4138765..4139881	chr3D:4125048..4126164	175	19.3439	6.2	47.32	4	Cytoplasmic;Extracellular
TaPEBP39	TraesCS3D02G144500.1	-	chr3D:107678184..107682447	chr3D:108172014..108175994	180	19.8387	6.82	39.42	4	Cytoplasmic;Extracellular
TaPEBP40	TraesCS4A02G409200.1	+	chr4A:681790047..681791660	chr4A:683054668..683056281	175	19.6103	9.2	40.15	4	Nuclear;Cytoplasmic
TaPEBP41	TraesCS4B02G073800.1	+	chr4B:69162990..69165036	chr4B:72254033..72256079	179	20.2771	8.5	49.65	4	Extracellular
TaPEBP42	TraesCS4B02G307600.1	-	chr4B:597741168..597742418	chr4B:596715307..596716557	175	19.5982	8.79	35.48	4	Nuclear;Cytoplasmic
TaPEBP43	TraesCS4B02G379100.1	+	chr4B:660518550..660519802	chr4B:660605391..660606643	180	19.9437	8.89	40.53	4	Cytoplasmic
TaPEBP44	TraesCS4B02G380600.1	-	chr4B:660683438..660684953	chr4B:660770238..660771795	179	19.8216	8.89	38.19	4	Cytoplasmic
TaPEBP45	TraesCS4D02G072300.1	+	chr4D:47438732..47440956	chr4D:47981885..47984109	179	20.3022	8.88	50.73	4	Extracellular
TaPEBP46	TraesCS4D02G305800.1	-	chr4D:474376763..474378043	chr4D:474483848..474485128	175	19.6063	9.41	32.92	4	Nuclear;Cytoplasmic
TaPEBP47	TraesCS5A02G128600.1	+	chr5A:287610232..287611637	chr5A:288198894..288200299	173	19.6064	9	43.18	4	Cytoplasmic
TaPEBP48	TraesCS5A02G154600.1	-	chr5A:331888532..331889964	chr5A:332366362..332367794	178	19.6493	8.68	51.65	4	Extracellular
TaPEBP49	TraesCS5A02G297300.3	-	chr5A:505020022..505023654	chr5A:505602996..505606628	173	19.354	7.85	44.54	4	Mitochondrial
TaPEBP50	TraesCS5A02G546800.1	-	chr5A:700694911..700696301	chr5A:703294700..703293310	182	20.4013	7.1	43.89	4	Extracellular
TaPEBP51	TraesCS5A02G546900.1	-	chr5A:700785235..700786681	chr5A:703383634..703385080	178	19.7165	9.29	41.32	4	Cytoplasmic
TaPEBP52	TraesCS5B02G020300.1	-	chr5B:19790435..19792559	chr5B:20032953..20035077	175	19.4219	7.84	31.81	4	Mitochondrial
TaPEBP53	TraesCS5B02G127600.1	-	chr5B:232784761..232786133	chr5B:235973521..235974893	173	19.6064	9	43.18	4	Cytoplasmic
TaPEBP54	TraesCS5B02G152800.1	-	chr5B:282010747..282012281	chr5B:285091940..285093474	178	19.5531	8.32	52.2	4	Extracellular
TaPEBP55	TraesCS5B02G296600.1	-	chr5B:479726810..479732884	chr5B:482709142..482715216	178	19.8265	8.73	42.98	5	Mitochondrial;Cytoplasmic
TaPEBP56	TraesCS5D02G136300.1	+	chr5D:216998511..216999900	chr5D:219998281..219999670	173	19.6244	9	43.18	4	Cytoplasmic
TaPEBP57	TraesCS5D02G159500.1	-	chr5D:249086452..249087618	chr5D:251903891..251905057	178	19.5531	8.32	52.83	4	Extracellular
TaPEBP58	TraesCS5D02G304400.1	-	chr5D:399614457..399620347	chr5D:402423284..402428986	178	19.7985	8.73	42.98	5	Mitochondrial;Cytoplasmic
TaPEBP59	TraesCS6A02G160200.1	+	chr6A:153520904..153522050	chr6A:156224431..156225577	183	20.4061	8.6	38.51	4	Extracellular;Cytoplasmic
TaPEBP60	TraesCS6A02G214400.1	-	chr6A:392193536..392195663	chr6A:394500230..394502353	174	19.5992	7.76	44.13	4	Extracellular;Nuclear
TaPEBP61	TraesCS6B02G191200.1	-	chr6B:225310892..225311941	chr6B:231371539..231372588	183	20.4081	8.97	43.3	4	Extracellular;Cytoplasmic
TaPEBP62	TraesCS6B02G244400.1	-	chr6B:435832157..435834342	chr6B:444117310..444119495	174	19.6262	7.76	44.13	4	Extracellular
TaPEBP63	TraesCS6D02G152500.1	-	chr6D:126616022..126617075	chr6D:148116116..148117169	183	20.4481	8.97	43.3	4	Extracellular;Cytoplasmic
TaPEBP64	TraesCS6D02G197100.1	-	chr6D:273922400..273924441	chr6D:295622492..295624531	174	19.5992	7.76	44.13	4	Extracellular;Nuclear
TaPEBP65	TraesCS7A02G115400.1	+	chr7A:71669854..71670886	chr7A:74957656..74958688	176	19.6633	7.73	32.13	3	Cytoplasmic;Extracellular
TaPEBP66	TraesCS7A02G229400.1	+	chr7A:199670409..199673511	chr7A:205794239..20579734	180	19.5186	7.91	50.45	4	Mitochondrial;Cytoplasmic;PlasmaMembrane
TaPEBP67	TraesCS7B02G013100.1	+	chr7B:9702354..9704354	chr7B:10072084..10074084	177	19.8496	7.73	32.54	3	Cytoplasmic;Extracellular
TaPEBP68	TraesCS7B02G195200.1	+	chr7B:335621146..335623045	chr7B:166799803..166801702	180	19.5486	7.91	49.98	4	Mitochondrial;Cytoplasmic
TaPEBP69	TraesCS7B02G272600.1	+	chr7B:500234078..500236678	chr7B:504557125..504559141	173	19.38	6.9	49.8	4	Extracellular
TaPEBP70	TraesCS7D02G111600.1	-	chr7D:68415945..68417871	chr7D:70130098..70132024	177	19.8636	7.73	32.54	3	Cytoplasmic;Extracellular
TaPEBP71	TraesCS7D02G230000.1	+	chr7D:191058446..191060316	chr7D:192932702..192934572	180	19.5186	7.91	50.45	4	Mitochondrial;Cytoplasmic;PlasmaMembrane
TaPEBP72	TraesCSU02G045800.1	+	chrUn:35827680..35829501	chr3B:6601675..6603496	175	19.2747	6.07	43.35	4	Cytoplasmic
TaPEBP73	TraesCSU02G130700.1	-	chrUn:110687619..110688709	chr4D:510703421..510704511	180	20.5637	9.85	40.23	4	Cytoplasmic;Mitochondrial
TaPEBP74	TraesCSU02G130800.1	-	chrUn:110690619..110692328	chr4D:510706421..510708130	182	19.9236	7.98	41.29	4	Cytoplasmic;Extracellular
TaPEBP75	TraesCSU02G130900.1	-	chrUn:110699874..110701425	chr4D:510715676..510717227	179	19.6213	9.3	43.79	4	Cytoplasmic
TaPEBP76	TraesCSU02G202000.1	-	chrUn:300431043..300432838	ChUn:225048280..225050075	173	20.1101	7.88	42.19	4	Cytoplasmic;Extracellular

## Sheet: T. dicoccoides
Table S2. Characteristics features of PEBP genes in T. dicoccoides
PEBP Genes Name	Transcript ID	Strand	Location(v1.0)	Location(v2.0)	Length	Mw	pI	Instability index	Exon	Subcellular Localization
TdPEBP1	TRIDC1AG043910.3	-	chr1A:493255628..493256329	chr1A:505095615..505096315	171	18.4447	5.06	44.86	3	Cytoplasmic
TdPEBP2	TRIDC1AG050000.2	-	chr1A:526884154..526886534	chr1A:539654960..539656388	180	20.0108	7.9	47.21	4	Extracellular; Cytoplasmic
TdPEBP3	TRIDC1BG049730.2	-	chr1B:531616059..531617027	chr1B:545656151..545656745	168	17.913	4.86	40.92	2	Cytoplasmic
TdPEBP4	TRIDC1BG056870.2	-	chr1B:588347980..588350366	chr1B:602342457..602343851	180	19.9807	7.88	47.56	4	Extracellular; Cytoplasmic
TdPEBP5	TRIDC2AG016280.2	-	chr2A:82962951..82965291	chr2A:87811129..87813068	183	20.3392	9.2	57.91	4	Extracellular; Chloroplast
TdPEBP6	TRIDC2AG042520.1	-	chr2A:501620625..501622431	chr2A:510002056..510003050	173	19.6213	9.3	43.79	4	Cytoplasmic
TdPEBP7	TRIDC2AG050170.1	-	chr2A:579551143..579553224	chr2A:588191123..588193084	174	19.4401	8.93	40.82	4	Chloroplast
TdPEBP8	TRIDC2BG019610.2	-	chr2B:129142712..129145139	chr2B:140716233..140718169	186	20.6647	9.2	55.24	4	Extracellular; Chloroplast
TdPEBP9	TRIDC2BG045660.1	-	chr2B:444889616..444891314	chr2B:459736115..459737118	173	19.6653	8.96	45.84	4	Cytoplasmic
TdPEBP10	TRIDC2BG053180.1	-	chr2B:519773156..519775380	chr2B:536247260..536249223	174	19.6653	8.96	39.46	4	Chloroplast
TdPEBP11	TRIDC2BG073950.1	+	chr2B:702623949..702624840	chr2B:721836683..721837574	173	19.1656	6.69	46.36	4	Extracellular
TdPEBP12	TRIDC2BG082020.1	-	chr2B:756599355..756602704	chr2B:776644132..776647476	174	19.7033	9.15	42.64	4	Extracellular; Cytoplasmic
TdPEBP13	TRIDC2BG082050.1	-	chr2B:756810576..756811580	chr2B:776855348..776856352	173	19.414	8.5	40.46	4	Extracellular; Cytoplasmic
TdPEBP14	TRIDC3AG001580.1	-	chr3A:5622605..5625386	chr3A:10738615..10741396	173	19.0754	6.35	43.27	4	Extracellular; Cytoplasmic
TdPEBP15	TRIDC3AG002240.1	-	chr3A:7494617..7498318	chr3A:8499315..8502749	196	21.759	9.61	54.46	4	Mitochondrial
TdPEBP16	TRIDC3BG001240.1	+	chr3B:4468818..4473236	chr3B:4578738..4583156	175	19.2571	6.97	48.75	4	Extracellular; Cytoplasmic
TdPEBP17	TRIDC3BG001930.1	+	chr3B:6712217..6713311	chr3B:7044480..7045574	173	19.1105	5.93	39.56	4	Extracellular; Cytoplasmic
TdPEBP18	TRIDC3BG023020.3	-	chr3B:166275836..166279297	chr3B:172419206..172422393	180	19.8247	6.82	38.94	4	Extracellular; Cytoplasmic
TdPEBP19	TRIDC4AG038060.1	-	chr4A:543885088..543887020	chr4A:548811968..548813814	179	20.2861	8.88	48.27	4	Extracellular
TdPEBP20	TRIDC4AG055900.1	+	chr4A:637386232..637387218	chr4A:647166742..647167728	175	19.6243	9.2	40.64	4	Cytoplasmic; Nuclear
TdPEBP21	TRIDC4BG011340.1	+	chr4B:66700861..66702658	chr4B:68522350..68524147	174	19.7534	8.9	50.79	4	Extracellular
TdPEBP22	TRIDC4BG052450.1	-	chr4B:603465424..603466373	chr4B:609309045..609309994	175	19.5542	9.16	35.48	4	Cytoplasmic; Nuclear
TdPEBP23	TRIDC5AG021790.2	-	chr5A:285061581..285063216	chr5A:502153827..502154696	173	19.6064	9	43.18	4	Cytoplasmic
TdPEBP24	TRIDC5AG025720.2	-	chr5A:329287568..329288643	chr5A:277395472..277396547	178	19.6212	8.68	51.17	4	Extracellular
TdPEBP25	TRIDC5AG044450.4	-	chr5A:500563586..500567123	chr5A:454478694..454482231	173	19.354	7.85	44.54	4	Mitochondrial
TdPEBP26	TRIDC5AG077200.1	-	chr5A:691772479..691774112	chr5A:705847995..705849467	179	19.8527	7.89	34.69	4	Cytoplasmic
TdPEBP27	TRIDC5BG022370.2	-	chr5B:240571906..240574137	chr5B:246505417..246506282	173	19.6064	9	43.18	4	Cytoplasmic
TdPEBP28	TRIDC5BG026830.1	-	chr5B:289948084..289949233	chr5B:295941623..295942772	178	19.6073	9.12	52.95	4	Extracellular
TdPEBP29	TRIDC5BG048350.3	-	chr5B:485700696..485705625	chr5B:492571136..492575919	173	19.312	8.73	43.94	5	Cytoplasmic; Mitochondrial
TdPEBP30	TRIDC6AG022660.1	+	chr6A:152141055..152142205	chr6A:159119393..159120543	184	20.5612	8.06	40.45	4	Extracellular; Cytoplasmic; Nuclear
TdPEBP31	TRIDC6AG033260.2	-	chr6A:393959963..393962208	chr6A:404028096..404030000	174	19.5992	7.76	44.13	4	Extracellular; Nuclear
TdPEBP32	TRIDC6BG039600.2	-	chr6B:420440563..420442871	chr6B:434724731..434726623	174	19.6262	7.76	44.13	4	Extracellular
TdPEBP33	TRIDC7AG013410.1	+	chr7A:65588170..65589912	chr7A:74527629..74528659	177	19.8496	7.73	32.54	3	Extracellular; Cytoplasmic
TdPEBP34	TRIDC7AG029330.1	+	chr7A:198138011..198139936	chr7A:209332286..209333687	180	19.5186	7.91	50.45	4	PlasmaMembrane; Cytoplasmic; Mitochondrial
TdPEBP35	TRIDC7BG001930.1	+	chr7B:13974913..13977137	chr7B:17532471..17534695	177	19.8496	7.73	32.54	3	Extracellular; Cytoplasmic
TdPEBP36	TRIDC7BG044260.1	+	chr7B:504248520..504250967	chr7B:509657885..509660332	173	19.38	6.9	49.8	4	Extracellular
TdPEBP37	TRIDC0UG012660.1	+	chrUn:87303046..87304485	chr4B:673500216..673501467	180	19.9177	8.89	39.46	4	Cytoplasmic
TdPEBP38	TRIDC0UG012790.2	-	chrUn:87459052..87460787	chr4B:673656364..673657880	179	19.8286	9.29	41.96	4	Cytoplasmic

## Sheet: T. urartu
Table S2. Characteristics features of PEBP genes in T. urartu
PEBP Genes Name	Transcript ID	Strand	Location	Length	Mw	pI	Instability index	Exon	Subcellular Localization
TuPEBP1	TuG1812G0200001370.01.T01	-	chr2A:73684481..73686845	174	19.2815	8.85	55.63	4	Extracellular; Chloroplast
TuPEBP2	TuG1812G0200003294.01.T01	-	chr2A:475981422..475983153	174	19.7501	9.3	43.79	4	Cytoplasmic
TuPEBP3	TuG1812G0200003943.01.T01	-	chr2A:565304407..565306588	175	19.5688	8.93	40.82	4	Chloroplast
TuPEBP4	TuG1812G0200005282.01.T01	-	chr2A:696712302..696713529	173	19.3274	7.67	45.37	4	Extracellular
TuPEBP5	TuG1812G0200005808.01.T01	-	chr2A:728200109..728201158	174	19.4136	8.88	40.41	4	Extracellular; Cytoplasmic
TuPEBP6	TuG1812G0300000063.01.T01	-	chr3A:1977662..1981005	176	19.463	8.73	49.86	4	Extracellular
TuPEBP7	TuG1812G0300000172.01.T01	-	chr3A:5955435..5956980	176	19.4905	6.3	45.71	4	Extracellular; Cytoplasmic
TuPEBP8	TuG1812G0300001662.01.T01	+	chr3A:128933095..128936909	179	19.7312	6.72	34.07	4	Extracellular; Cytoplasmic
TuPEBP9	TuG1812G0400000699.01.T01	-	chr4A:54010667..54012907	180	20.3848	8.88	48.27	4	Extracellular
TuPEBP10	TuG1812G0400003438.01.T01	-	chr4A:585069402..585070917	176	19.739	9.2	40.15	4	Cytoplasmic; Nuclear
TuPEBP11	TuG1812G0500001359.01.T01	+	chr5A:215433983..215435597	174	19.7352	9	43.18	4	Cytoplasmic
TuPEBP12	TuG1812G0500005564.01.T01	-	chr5A:653430427..653431985	183	20.5521	6.64	43.27	4	Extracellular
TuPEBP13	TuG1812G0600001665.01.T01	+	chr6A:143460396..143461516	173	19.2638	7.8	41.14	4	Extracellular; Cytoplasmic
TuPEBP14	TuG1812G0600002284.01.T01	-	chr6A:395491369..395493444	174	19.5992	7.76	44.13	4	Extracellular; Nuclear
TuPEBP15	TuG1812G0700002439.01.T01	+	chr7A:198994974..198996764	181	19.6473	7.91	50.45	4	PlasmaMembrane; Cytoplasmic; Mitochondrial
TuPEBP16	TuG1812U0000090100.01.T01	-	chr2A:73684481..73686845	173	19.1528	8.85	55.63	4	Extracellular; Chloroplast

## Sheet: Ae. tauschii
Table S2. Characteristics features of PEBP genes in Ae. tauschii
PEBP Genes Name	Transcript ID	Strand	Location	Length	Mw	pI	Instability index	Exon	Subcellular Localization
AetPEBP1	AET1Gv20703200.2	-	chr1:400734040..400735055	245	26.908	6.56	53.89	2	Nuclear
AetPEBP2	AET2Gv20263500.1	-	chr2:79809997..79812474	173	19.1798	8.85	52.61	4	Extracellular; Chloroplast
AetPEBP3	AET2Gv20667400.5	-	chr2:372951986..372958001	173	19.6363	8.96	42.81	4	Cytoplasmic
AetPEBP4	AET2Gv21070700.1	+	chr2:584230148..584231030	152	16.9271	5.31	47.82	4	Extracellular
AetPEBP5	AET2Gv21178100.2	-	chr2:618055150..618056158	172	19.2097	8.54	36.54	4	Extracellular; Cytoplasmic
AetPEBP6	AET2Gv21178200.1	-	chr2:618064823..618065959	173	19.3169	8.5	40.84	4	Extracellular; Cytoplasmic
AetPEBP7	AET3Gv20014800.1	+	chr3:2555378..2558863	194	21.745	9.44	51.91	4	Cytoplasmic; Mitochondrial; Nuclear
AetPEBP8	AET3Gv20026400.1	+	chr3:4489735..4490724	175	19.3339	5.92	43.74	4	Cytoplasmic
AetPEBP9	AET3Gv20310600.6	-	chr3:109875552..109878846	180	19.8247	6.82	38.94	4	Extracellular; Cytoplasmic
AetPEBP10	AET4Gv20152400.1	+	chr4:50250529..50252492	179	20.3022	8.88	50.73	4	Extracellular
AetPEBP11	AET4Gv20737800.1	-	chr4:480827784..480828724	175	19.6063	9.41	32.92	4	Cytoplasmic; Nuclear
AetPEBP12	AET4Gv20853400.1	+	chr4:517719766..517723982	174	19.3788	6.81	48.66	4	Cytoplasmic
AetPEBP13	AET4Gv20858300.1	-	chr4:518707418..518708508	180	20.1101	7.88	42.19	4	Extracellular; Cytoplasmic
AetPEBP14	AET4Gv20858400.1	-	chr4:518710434..518712129	177	19.9029	9.56	42.42	4	Cytoplasmic; Mitochondrial
AetPEBP15	AET4Gv20858500.1	-	chr4:518719659..518721084	175	19.6023	8.9	41.8	4	Extracellular; Cytoplasmic
AetPEBP16	AET5Gv20348200.3	+	chr5:223396727..223398153	201	22.8202	9.69	44.27	4	Mitochondrial
AetPEBP17	AET5Gv20394000.2	-	chr5:255678707..255679706	178	22.8202	9.69	52.83	4	Extracellular
AetPEBP18	AET5Gv20690000.16	-	chr5:407139470..407144093	173	19.312	8.73	43.94	5	Cytoplasmic; Mitochondrial
AetPEBP19	AET6Gv20413600.1	-	chr6:150806590..150807646	184	20.5773	8.64	43.12	4	Extracellular; Cytoplasmic
AetPEBP20	AET6Gv20566800.3	-	chr6:297516140..297518044	174	19.5992	7.76	44.13	4	Extracellular; Nuclear
AetPEBP21	AET7Gv20290900.2	-	chr7:69247228..69248924	177	19.8636	7.73	32.54	3	Extracellular; Cytoplasmic
AetPEBP22	AET7Gv20568800.1	+	chr7:192406178..192408356	180	19.5186	7.91	50.45	4	PlasmaMembrane; Cytoplasmic; Mitochondrial

## Sheet: Arabidopsis
Table S2. Characteristics features of PEBP genes in Arabidopsis
PEBP Genes Name	Transcript ID	Strand	Location	Length	Mw	pI	Instability index	Exon	Subcellular Localization
AtPEBP1	AT1G18100.1	-	chr1:6227217..6230188	173	19.1341	7.93	51.44	3	Cytoplasmic
AtPEBP2	AT1G65480.1	+	chr1:24331428..24333934	175	19.8085	7.75	48.81	3	Extracellular
AtPEBP3	AT2G27550.1	+	chr2:11773251..11774681	175	19.8927	7.01	33.33	3	Cytoplasmic
AtPEBP4	AT4G20370.1	-	chr4:11000771..11002996	175	19.6883	7.76	41.54	3	Extracellular
AtPEBP5	AT5G01300.1	-	chr5:121483..122525	162	17.8234	5.33	32.45	2	Cytoplasmic
AtPEBP6	AT5G03840.1	-	chr5:1024641..1025812	177	20.1582	9.69	44.52	3	Cytoplasmic
AtPEBP7	AT5G62040.1	+	chr5:24922810..24923709	177	20.0079	9.16	48.12	3	Chloroplast

## Sheet: PEBP-Like
Table S2. Characteristics of PEBP-Like genes in some monocotyledons and dicotyledons
Species Name*	Gene ID	Transcript ID	Location	Strand	Length	Mw	pI	Exon	Subcellular Localization
Triticum aestivum L.	TraesCS1A01G295800	TraesCS1A02G295800.1	chr1A:490794344..490797100	-	165	17.7579	4.84	3	Cytoplasmic
Triticum aestivum L.	TraesCS1B01G304800	TraesCS1B02G304800.1	chr1B:527370862..527371626	-	167	17.7939	4.93	3	Cytoplasmic
Triticum aestivum L.	TraesCS1D01G296500	TraesCS1D02G296500.1	chr1D:394466710..394467566	+	165	17.7438	4.84	2	Cytoplasmic
Triticum dicoccoides	TRIDC1AG043910	TRIDC1AG043910.3	chr1A:493255628..493256329	-	171	18.4447	5.06	3	Cytoplasmic
Triticum dicoccoides	TRIDC1BG049730	TRIDC1BG049730.2	chr1B:531616059..531617027	-	168	17.913	4.86	2	Cytoplasmic
Aegilops tauschii	AET1Gv20703200	AET1Gv20703200.2	chr1:400734040..400735055	-	245	26.908	6.56	2	Nuclear
Hordeum vulgare	HORVU1Hr1G070690	HORVU1Hr1G070690.1	chr1H:490781306:490782457	+	164	17.6127	4.93	2	Cytoplasmic; Mitochondrial
Oryza sativa	Os05g0468800	Os05t0468800-01	chr5:23013524:23014346	-	167	18.2457	5.71	2	Cytoplasmic
Sorghum bicolor	SORBI_3009G168800	EES19674	chr9:52480993:52482081	-	173	18.8072	5.77	2	Mitochondrial; Cytoplasmic
Zea mays	Zm00001d010586	Zm00001d010586_P001	chr8:121034171:121034963	-	174	18.7291	5.42	2	Cytoplasmic; Mitochondrial
Brachypodium distachyon	BRADI_2g22660v3	KQK05813	chr2:20161855:20162745	+	164	17.71	4.88	2	Cytoplasmic
Arabidopsis	AT5G01300	AT5G01300.1	chr5:121483..122525	-	162	17.8234	5.33	2	Cytoplasmic
Solanum lycopersicum	Solyc09g005060.2	Solyc09g005060.2.1	chr9:38884:40108	-	124	13.858	5.12	2	Cytoplasmic
Cucumis sativus	Csa_3G730940	KGN58730	chr3:27416206:27417003	-	167	18.2646	5.31	2	Cytoplasmic
Nicotiana attenuata	A4A49_02574	OIT01027	chr7:84648948:84650166	-	168	18.564	5.23	2	Cytoplasmic
Gossypium raimondii	B456_002G264900	KJB17097	chr2:62493797:62496815	+	170	18.9113	5.24	2	Cytoplasmic
Glycine max	GLYMA_01G123100	KRH75992	chr1:42339392:42341084	+	170	18.5679	4.92	2	Cytoplasmic; Chloroplast
* Species with black fonts are monocotyledons, and species with red fonts are dicotyledons.
