# Supplementary material for: Genome-wide member identification, phylogeny and expression analysis of PEBP gene family in wheat and its progenitors
Source: PeerJ. 2020 Dec 15;8:e10483. doi: 10.7717/peerj.10483 (PMC7747686; doi:10.7717/peerj.10483)
Supplement: Supplemental Information 3 [file peerj-08-10483-s003.xls]

## Sheet: Supplementary Table S3
Table S3. Collinearity analysis of PEBP genes between wheat and its progenitor species.
T. aestivum L.	T. dicoccoides	T. urartu	Ae. tauschii
TraesCS1A01G295800	TRIDC1AG043910; TRIDC1BG049730		AET1Gv20703200
TraesCS1B01G304800	TRIDC1AG043910; TRIDC1BG049730		AET1Gv20703200
TraesCS1D01G296500	TRIDC1AG043910; TRIDC1BG049730		AET1Gv20703200
TraesCS2A01G485000	TRIDC2BG073950	TuG1812G0200005282.01.T01	AET2Gv21070700
TraesCS2A01G132300	TRIDC2BG019610	TuG1812G0200001370.01.T01	AET2Gv20263500
TraesCS2A01G536600	TRIDC2BG082020	TuG1812G0200005808.01.T01	AET2Gv21178200
TraesCS2A01G347000	TRIDC2AG050170; TRIDC2BG053180	TuG1812G0200003943.01.T01
TraesCS2B01G154800	TRIDC2BG019610	TuG1812G0200001370.01.T01	AET2Gv20263500
TraesCS2B01G365300	TRIDC2AG050170; TRIDC2BG053180	TuG1812G0200003943.01.T01
TraesCS2B01G511400	TRIDC2BG073950	TuG1812G0200005282.01.T01	AET2Gv21070700
TraesCS2B01G567200	TRIDC2BG082020	TuG1812G0200005808.01.T01	AET2Gv21178200
TraesCS2B01G310700	TRIDC2AG042520; TRIDC2BG045660	TuG1812G0200003294.01.T01
TraesCS2D01G538100	TRIDC2BG082020	TuG1812G0200005808.01.T01	AET2Gv21178200
TraesCS2D01G345700	TRIDC2AG050170; TRIDC2BG053180	TuG1812G0200003943.01.T01
TraesCS2D01G134200	TRIDC2BG019610	TuG1812G0200001370.01.T01	AET2Gv20263500
TraesCS2D01G485100	TRIDC2BG073950	TuG1812G0200005282.01.T01	AET2Gv21070700
TraesCS2D01G292000	TRIDC2AG042520; TRIDC2BG045660	TuG1812G0200003294.01.T01
TraesCS3A01G006600	TRIDC3AG002240; TRIDC3BG001240		AET3Gv20014800
TraesCS3A01G143100		TuG1812G0300001662.01.T01	AET3Gv20310600
TraesCS3A01G013100	TRIDC3AG001580; TRIDC3BG001930	TuG1812G0300000172.01.T01	AET3Gv20026400
TraesCS3B01G015700	TRIDC3AG001580; TRIDC3BG001930	TuG1812G0300000172.01.T01	AET3Gv20026400
TraesCS3B01G007400	TRIDC3AG002240; TRIDC3BG001240		AET3Gv20014800
TraesCS3B01G010100	TRIDC3AG002240; TRIDC3BG001240		AET3Gv20014800
TraesCS3D01G011700	TRIDC3AG001580; TRIDC3BG001930	TuG1812G0300000172.01.T01	AET3Gv20026400
TraesCS3D01G144500		TuG1812G0300001662.01.T01	AET3Gv20310600
TraesCS3D01G004100	TRIDC3AG002240; TRIDC3BG001240		AET3Gv20014800
TraesCS4A01G409200	TRIDC4AG055900; TRIDC4BG052450	TuG1812G0400003438.01.T01	AET4Gv20737800
TraesCS4B01G073800	TRIDC4AG038060; TRIDC4BG011340	TuG1812G0400000699.01.T01	AET4Gv20152400
TraesCS4B01G307600	TRIDC4AG055900; TRIDC4BG052450	TuG1812G0400003438.01.T01	AET4Gv20737800
TraesCS4B01G379100	TRIDC5AG077200	TuG1812G0500005564.01.T01	AET4Gv20858400
TraesCS4B01G380600	TRIDC5AG077200	TuG1812G0500005564.01.T01	AET4Gv20858400
TraesCS4D01G072300	TRIDC4AG038060; TRIDC4BG011340	TuG1812G0400000699.01.T01	AET4Gv20152400
TraesCS4D01G305800	TRIDC4AG055900; TRIDC4BG052450	TuG1812G0400003438.01.T01	AET4Gv20737800
TraesCS5A01G546900	TRIDC5AG077200	TuG1812G0500005564.01.T01	AET4Gv20858400
TraesCS5A01G128600	TRIDC5AG021790; TRIDC5BG022370		AET5Gv20348200
TraesCS5A01G154600	TRIDC5BG026830		AET5Gv20394000
TraesCS5A01G297300	TRIDC5AG044450
TraesCS5B01G296600	TRIDC5AG044450
TraesCS5B01G127600	TRIDC5AG021790; TRIDC5BG022370		AET5Gv20348200
TraesCS5B01G152800	TRIDC5BG026830		AET5Gv20394000
TraesCS5D01G159500	TRIDC5BG026830		AET5Gv20394000
TraesCS5D01G136300	TRIDC5AG021790; TRIDC5BG022370		AET5Gv20348200
TraesCS5D01G304400	TRIDC5AG044450
TraesCS6A01G160200	TRIDC6AG022660	TuG1812G0600001665.01.T01	AET6Gv20413600
TraesCS6A01G214400		TuG1812G0600002284.01.T01	AET6Gv20566800
TraesCS6B01G191200	TRIDC6AG022660	TuG1812G0600001665.01.T01	AET6Gv20413600
TraesCS6B01G244400		TuG1812G0600002284.01.T01	AET6Gv20566800
TraesCS6D01G197100		TuG1812G0600002284.01.T01	AET6Gv20566800
TraesCS6D01G152500	TRIDC6AG022660	TuG1812G0600001665.01.T01	AET6Gv20413600
TraesCS7A01G115400	TRIDC7AG013410; TRIDC7BG001930		AET7Gv20290900
TraesCS7A01G229400	TRIDC7AG029330	TuG1812G0700002439.01.T01	AET7Gv20568800
TraesCS7B01G013100	TRIDC7AG013410; TRIDC7BG001930		AET7Gv20290900
TraesCS7B01G195200	TRIDC7AG029330		AET7Gv20568800
TraesCS7B01G272600	TRIDC7BG044260
TraesCS7D01G111600	TRIDC7AG013410; TRIDC7BG001930		AET7Gv20290900
TraesCS7D01G230000	TRIDC7AG029330	TuG1812G0700002439.01.T01	AET7Gv20568800
