# Supplementary material for: Genome-wide member identification, phylogeny and expression analysis of PEBP gene family in wheat and its progenitors
Source: PeerJ. 2020 Dec 15;8:e10483. doi: 10.7717/peerj.10483 (PMC7747686; doi:10.7717/peerj.10483)
Supplement: Supplemental Information 4 [file peerj-08-10483-s004.xls]

## Sheet: Tissue and grain development
														Raw data of different stages of grain development
	Roots	Stem	Leaf	Spike	Endosperm	Embryo	Seed Coat	Stigma & Ovary	Anther	10DAY	20DAY	30DAY		10-W	20-AL	20-TC	20-SE	30-ALSE	30-SE
TaPEBP1	1.508	1.77635	35.0857	0.376052	70.4958	144.14	11.3484	0.46155	1.05436	1.45	92.1	13		1.45	71.6	18.75	1.75	7.95	5.05
TaPEBP2	0.832533	0.431142	0.291132	0.236347	0.517043	2.11003	0.0516417	0.724874	0.18901	0.05	0.3	0.2		0.05	0.2	0.05	0.05	0.15	0.05
TaPEBP3	9.98165	5.17706	36.7976	0.77933	124.322	307.417	12.3324	1.21782	5.0786	1.05	96.65	13.35		1.05	58.05	36.5	2.1	7.1	6.25
TaPEBP4	0.195315	0.0157337	0.306908	0.0738697	0.247462	0.544461	0	0.288292	0.0341751	0	0.05	0.05		0	0	0.05	0	0.05	0
TaPEBP5	3.89742	4.75856	54.5557	1.57656	121.273	302.22	6.97129	2.09996	11.5979	2	121.45	52.8		2	95.25	23.6	2.6	35.85	16.95
TaPEBP6	0.529542	0.0484925	0.194893	0.125607	0.52051	1.38076	0.242112	0.378043	0.148004	0	0.1	0.2		0	0.05	0	0.05	0.05	0.15
TaPEBP7	0.0566387	0.0486903	1.95234	0.0350103	0	0	0	0.0973087	0.00886504	0	0	0		0	0	0	0	0	0
TaPEBP8	2.24979	0.24903	0.223961	0.105965	0.312792	0.159436	0	0.337171	0.201416	0.05	0	0.1		0.05	0	0	0	0.05	0.05
TaPEBP9	0	0	0.051428	0	0	0	0	0	0	0	0	0		0	0	0	0	0	0
TaPEBP10	0	0	0.017749	0	0	0	0	0	0	0	0	0		0	0	0	0	0	0
TaPEBP11	0	0	0.017749	0	0	0	0	0	0	0	0	0		0	0	0	0	0	0
TaPEBP12	0	0	0.0298853	0	0	0	0	0	0	0	0	0		0	0	0	0	0	0
TaPEBP13	0.016898	0.05314	0.518573	0.0747686	0	0	0	0.134344	0.0133056	0	0	0		0	0	0	0	0	0
TaPEBP14	3.32672	4.70915	0.334827	0.0286932	0	0	0.18938	0.385982	0.0366008	0.05	0	0		0.05	0	0	0	0	0
TaPEBP15	3.95973	0.184734	0.12578	0.104234	0	0.541196	0	0.218057	0.37926	0.05	0	0		0.05	0	0	0	0	0
TaPEBP16	0.003897	0.0326172	0.21002	0	0	0	0	0	0	0	0	0		0	0	0	0	0	0
TaPEBP17	0	0	0.00227952	0.000603155	0	0	0	0	0	0	0	0		0	0	0	0	0	0
TaPEBP18	0	0	0.00311274	0.000603155	0	0	0	0	0	0	0	0		0	0	0	0	0	0
TaPEBP19	0.0167093	0.13442	1.66256	0.198626	0	0.0170809	0	0.104249	0.0341385	0	0	0		0	0	0	0	0	0
TaPEBP20	4.45506	2.81252	0.0368008	0.0964257	0.00947493	0.101581	0.175323	13.0573	0.00997983	0	0	0		0	0	0	0	0	0
TaPEBP21	1.17486	0.0519686	0.0740709	0.0199686	0.0319472	0.0378713	0	0.178575	0.580558	0	0	0		0	0	0	0	0	0
TaPEBP22	1.00728e-07	4.52141e-07	0.0176986	0	0	0	0	0	0	0	0	0		0	0	0	0	0	0
TaPEBP23	0	0	0.127669	0.003399	0	0	0	0	0	0	0	0		0	0	0	0	0	0
TaPEBP24	0	0	0.2678	0	0	0	0	0	0	0	0	0		0	0	0	0	0	0
TaPEBP25	0.0680142	0	0.002835	0.00188961	4.49198	54.4402	0.95932	0	0	7.7	79.8	6.6		7.7	70.65	7.05	2.1	4.85	1.75
TaPEBP26	0	0	0.0285075	0	0	0	0	0	0	0	0	0		0	0	0	0	0	0
TaPEBP27	1.85713	89.7391	19.7018	11.0782	2.18837	1.508	106.464	3.17172	2.43277	0	0.6	0.05		0	0.25	0.3	0.05	0.05	0
TaPEBP28	0.00109522	0	0.156605	0.00167626	0.468652	5.77139	0.804939	0	0	1.1	42.45	3.45		1.1	38.9	2.8	0.75	3.1	0.35
TaPEBP29	0	0	0.0117181	0	1.66958	11.3678	1.67984	0	0	5.7	68.05	4.75		5.7	63.85	2.85	1.35	4.15	0.6
TaPEBP30	0	0	0.0051807	0	0	0	0	0	0	0.1	0.1	0.05		0.1	0	0.05	0.05	0.05	0
TaPEBP31	0.00172182	0.0481261	0.00593001	0	0	0	0	0	0	0.2	0.2	0.1		0.2	0	0.1	0.1	0.05	0.05
TaPEBP32	0	0.0130753	0.030249	0	0	0	0	0	0	0	0	0		0	0	0	0	0	0
TaPEBP33	0.00314914	0	0.259601	0.00118601	0	0	0.129842	0	0	0.2	0.8	0.5		0.2	0	0.45	0.35	0.2	0.3
TaPEBP34	0.219764	8.4117	4.29291	3.16894	0.583162	0.594697	28.0402	5.96015	0.548259	0.05	0.05	0		0.05	0	0.05	0	0	0
TaPEBP35	0	0	0	0.000682201	2.44063	22.6592	0	0	0	1.95	16.65	1.45		1.95	13.2	3.1	0.35	1.15	0.3
TaPEBP36	0	0	0.00743565	0	0	0	0	0	0	0	0	0		0	0	0	0	0	0
TaPEBP37	0.00191926	0	0.0330522	0.000896242	0	0	0	0	0	0	0	0		0	0	0	0	0	0
TaPEBP38	0	0	0	0	0	0	0	0	0	0	0	0		0	0	0	0	0	0
TaPEBP39	1.99176	17.3074	6.49953	8.10232	1.3054	1.58177	47.7688	8.40461	1.16827	0.05	0.1	0.05		0.05	0	0.1	0	0	0.05
TaPEBP40	0.520325	23.1605	0.0123741	7.10058	0	0	0	0	0.0569628	0	0	0		0	0	0	0	0	0
TaPEBP41	0.512898	0.00604097	0.00187783	0	0	0	0	0	0	0	0	0		0	0	0	0	0	0
TaPEBP42	0.017825	0.264096	0.0131461	0	0	0	0	0	0	0	0	0		0	0	0	0	0	0
TaPEBP43	0	0	0.00518175	1.25248e-07	0	0	0	0	0	0	0	0		0	0	0	0	0	0
TaPEBP44	0	0	0.0341241	0	0	0	0	0	0	0	0	0		0	0	0	0	0	0
TaPEBP45	6.76962	0.0846916	0.000236148	0.0016367	0	0	0	0	0	0	0	0		0	0	0	0	0	0
TaPEBP46	0.169687	3.04643	0.00919474	0.0700577	0.0455517	0	0	0	0	0	0	0		0	0	0	0	0	0
TaPEBP47	16.4393	9.26322	0.184282	0.582076	0.155507	0.921626	0.342251	1.28148	1.11633	0.05	0.15	0.1		0.05	0	0.15	0	0.1	0
TaPEBP48	0.00687873	0.245309	0.121293	0	0	0	0	0	0	0	0	0		0	0	0	0	0	0
TaPEBP49	0.0406275	0.0535457	0.108761	0.0572871	0.0761977	0	0	0.213997	0.065734	0.05	0.2	0.15		0.05	0.15	0.05	0	0.1	0.05
TaPEBP50	0.000365252	0	0	0	0	0	0	0	0.0135232	0	0	0		0	0	0	0	0	0
TaPEBP51	0.000805383	0	0.00188783	0	0	0	0	0	0	0	0	0		0	0	0	0	0	0
TaPEBP52	0.0423144	4.00783	0.0657979	0.055857	0	0	0	0	0	0	0	0		0	0	0	0	0	0
TaPEBP53	19.3034	10.6238	0.517787	0.972608	0.679194	2.37157	1.02009	3.92588	0.790656	0.2	1.15	0.4		0.2	0.7	0.35	0.1	0.25	0.15
TaPEBP54	0	0.254379	0.181726	0	0	0	0	0	0.0244516	0	0	0		0	0	0	0	0	0
TaPEBP55	0.745017	0.994202	0.88937	0.532015	0.683778	1.19545	0.588241	0.466733	0.628487	0.2	0.5	0.65		0.2	0.3	0	0.2	0.35	0.3
TaPEBP56	18.0803	9.86003	0.214273	0.31579	0	0.0161521	0.36075	0.106987	0.0383734	0.3	0.25	0.1		0.3	0.2	0.05	0	0.1	0
TaPEBP57	0.00495718	0.118658	0.116339	0	0	0	0	0	0.0268635	0	0	0		0	0	0	0	0	0
TaPEBP58	2.08214	3.20533	1.13091	1.61411	1.14292	3.73102	0.224672	4.42603	1.83349	0.5	0.95	0.55		0.5	0.25	0.6	0.1	0.45	0.1
TaPEBP59	0	0	0.00470059	0	0	0	0	0	0	0	0	0		0	0	0	0	0	0
TaPEBP60	5.0718	0.194462	0.203642	0.0619591	0.0352027	0	0	0.290566	0.114061	0	0	0		0	0	0	0	0	0
TaPEBP61	0	0	0.00327534	0	0	0	0	0	0	0	0	0		0	0	0	0	0	0
TaPEBP62	1.39485	0.25198	0.212142	0.152939	0.0478502	0.607275	0	0.468487	0.108124	0	0	0		0	0	0	0	0	0
TaPEBP63	0	0	0.00190658	0	0	0	0	0	0	0	0.05	0		0	0	0.05	0	0	0
TaPEBP64	1.61657	0.0399701	0.105575	0.0161249	0	0	0	0	0.0285261	0.05	0	0		0.05	0	0	0	0	0
TaPEBP65	0.00930114	9.11579	0.996579	1.70805	0.0238662	0.117467	0.200548	0	0.0485518	0	0	0		0	0	0	0	0	0
TaPEBP66	0.0531842	0.083197	0.711632	0.0728714	203.037	1.38321	14.9412	0.36911	0.688345	121.8	422.9	219.9		121.8	72.3	201.75	148.85	103.55	116.35
TaPEBP67	0.0469646	79.0729	6.50673	5.10713	0	0.0738987	0.810932	0.0113093	0.325013	0	0	0		0	0	0	0	0	0
TaPEBP68	0.152495	0.0645777	0.760665	0.078221	141.068	0.898889	10.4969	0.209344	0.140335	48.35	200.15	91.85		48.35	23.15	106.45	70.55	42.25	49.6
TaPEBP69	0.000991933	0	0.00828219	0.00106569	0	0	0	0	0	0	0	0		0	0	0	0	0	0
TaPEBP70	0.0134147	23.8097	5.35907	1.21342	0	0	0.173055	0	0.0115574	0	0	0		0	0	0	0	0	0
TaPEBP71	0.0839261	0.0292676	0.521002	0.0578241	143.914	0.689605	4.8777	0.0746927	0.207069	38.7	172.05	73.35		38.7	29.75	88.05	54.25	31.95	41.4
TaPEBP72	0	1.06795	0.0216334	0.00214299	0	0	0	0	0	0	0	0		0	0	0	0	0	0
TaPEBP73	0.00812344	0	0.000641278	0.00504592	0	0	0	0	0.01261	0	0	0		0	0	0	0	0	0
TaPEBP74	0.00263025	0.0114894	0.00055332	0	0	0	0	0	0.0405697	0	0	0		0	0	0	0	0	0
TaPEBP75	0	0	0	0	0	0	0	0	0	0	0	0		0	0	0	0	0	0
TaPEBP76	9.33334	12.5512	0.0503537	0.202103	0.00930563	0	0.0572442	4.80851	0.148596	0.05	0	0		0.05	0	0	0	0	0

## Sheet: Multiple stress treatments
	CK_1	Pm_E09_24h	Pm_E09_48h	Pm_E09_72h	Yr_CYR31_24h	Yr_CYR31_48h	Yr_CYR31_72h	CK_2	Drought_1h	Drought_6h	Heat_1h	Heat_6h	CK_3	Cold	CK_4	Salt
TaPEBP1	84.3	27.9	26.3	16.3	282.5	23	53.3	5.4	89.9	757.9	18.2	10.6	1.9	56.2	0.3	30
TaPEBP2	0	0	0	0	0	0	0	0.2	0.2	0.1	0.2	0.7	0.4	0.8	0.2	0.2
TaPEBP3	32.5	8.1	7.2	6.7	58.1	9.1	17.9	1.5	73.3	1117.5	10.1	19.6	1	55.8	4.3	152.8
TaPEBP4	0	0	0	0	0	0.1	0.1	0	0.1	0	0	0.3	0	0	0.1	0
TaPEBP5	116.2	88.1	59.2	26.9	270.2	31.7	82.7	5.9	73.7	879.8	8.7	13.7	3.1	122.8	2.1	138.9
TaPEBP6	0	0.1	0.1	0.1	0	0.4	0	0.1	0.1	0	0.2	0.4	0.2	1.1	0.3	0.3
TaPEBP7	0.2	1.1	0	0.1	0.1	0.1	0.9	5.1	9.5	8.3	3.6	1.1	6.5	1.6	0	0
TaPEBP8	0.1	3.6	0.4	1	0	0	0.3	0	0	0	0	0	0.1	0.1	0.2	5.8
TaPEBP9	0	0	0	0	1.4	0	0	0	0	0	0	0	0	0	0	0
TaPEBP10	0	0	0	0	0	0	0	0	0	0	0	0	0	0	0	0
TaPEBP11	0	0	0	0	0	0	0	0	0	0	0	0	0	0	0	0
TaPEBP12	0	0	0	0	0	0	0	0	0	0	0	0	0	0	0	0
TaPEBP13	0	0.2	0	0	0	0.1	0.3	2.1	3.9	2.6	1.7	0.2	1.9	0.5	0	0
TaPEBP14	0	0.2	0	0	0.2	0.1	0.1	0	0	0	0	0	0	0	4	0.6
TaPEBP15	0	2	0.1	0.1	0.2	0.1	0	0	0	0	0	0	0	0.1	0.5	5.7
TaPEBP16	0	0	0	0	0.4	0.1	0	0	0	0	0	0	0	0	0	0
TaPEBP17	0	0	0	0	0	0	0	0	0	0	0	0	0	0	0	0
TaPEBP18	0	0	0	0	0	0	0	0	0	0	0	0	0	0	0	0
TaPEBP19	0.1	1.3	0.3	0	0	0.1	0.8	5.4	9.3	6.5	2.8	0.6	6.9	1.6	0	0
TaPEBP20	0	0.3	0.2	0.1	0.1	0.1	0.2	0	0	0	0	0	0	0	4.4	1.2
TaPEBP21	0	0.9	0	0	0.1	0	0	0	0	0	0	0	0	0.1	0.3	5.8
TaPEBP22	0	0	0	0	0	0	0	0	0	0	0	0	0	0	0	0
TaPEBP23	0	0.1	0	0	0	0	0	0	0	0	0	0	0	0	0	0
TaPEBP24	0	0	0	0	0	0	0	0	0	0	0	0	0	0	0	0
TaPEBP25	0	0	0	0	0	0	0	0	0	0	0	0	0	0	0	0
TaPEBP26	0.4	0.1	0	0	0.8	0	0	0	0	0	0	0	0	0	0	0
TaPEBP27	0.3	0	0.6	0.1	0.2	0.4	0.3	0.1	0.1	0.1	0	0	0	0.9	0	0
TaPEBP28	0	0	0	0	0	0	0	0	0	0	0	0	0	0	0	0
TaPEBP29	0	0	0	0.1	0.3	0	0	0	0	0	0	0	0	0	0	0
TaPEBP30	0	0	0	0	0.3	0	0	0	0	0.1	0	0	0	0	0	0
TaPEBP31	0.1	0	0	0.1	0.5	0	0	0	0	0	0	0	0	0	0	0
TaPEBP32	0.2	0	0	0	0.9	0	0.1	0	0	0	0.1	0	0	0	0	0
TaPEBP33	2	0.1	0.7	0.1	10	0	0	0	0	0	0	0	0	0	0	0
TaPEBP34	0.1	0.1	0.1	0.1	0	0	0.1	0	0	0.1	0	0	0	0.4	0	0
TaPEBP35	0	0	0	0	0	0	0	0	0	0	0	0	0	0	0	0
TaPEBP36	0	0	0	0	0	0	0.2	0	0	0	0	0	0	0	0	0
TaPEBP37	0.1	0	0	0	1	0	0	0	0	0	0	0	0	0	0	0
TaPEBP38	0	0	0	0	0	0	0	0	0	0	0	0	0	0	0	0
TaPEBP39	0	0	0	0	0	0	0.1	0	0	0	0	0	0	0.2	0	0
TaPEBP40	0.1	0.1	0.1	0	0.1	0	0	0	0	0	0	0	0	0	0.4	0
TaPEBP41	0	0	0	0	0	0	0	0	0	0	0	0	0	0	0.1	0.1
TaPEBP42	0	0	0	0	0	0.1	0	0	0	0	0	0	0	0	0	0
TaPEBP43	0.1	0	0	0	0	0	0	0	0	0	0	0	0	0	0	0
TaPEBP44	0	0	0	0	0	0	0	0	0	0	0	0	0	0.2	0	0
TaPEBP45	0	0	0	0	0	0	0	0	0	0	0	0	0	0	1.1	1
TaPEBP46	0	0	0.1	0.1	0	0	0	0	0	0	0	0	0	0	0.1	0
TaPEBP47	0.1	0.1	0.1	0	0	0.1	0	0.1	0.2	0.1	0	0	0.1	0.2	11.8	13.7
TaPEBP48	0	0	0	0	0	0	0	0	0	0	0	0	0	0	0	0
TaPEBP49	0.2	0	0.2	0.5	0	0.7	0.2	2.4	1.4	0	0.2	1.3	0.3	0.6	0	0.2
TaPEBP50	0	0	0	0	0	0	0	0	0	0	0	0	0	0	0	0
TaPEBP51	0	0	0	0	0	0	0	0	0	0	0	0	0	0	0	0
TaPEBP52	0.3	0.1	0.2	0.8	0.1	0	0.1	0.1	0.1	0.1	0	0	0.2	0.2	0	0
TaPEBP53	0.3	0.3	0.6	1.7	0.7	0.6	0.7	0.4	0.3	0.5	0.1	0.4	0.5	0.5	15.4	12.1
TaPEBP54	0	0	0	0	0	0	0	0	0	0	0	0	0	0	0	0
TaPEBP55	1.6	0.5	1.3	1.5	0.6	0.8	0.7	3.7	3	0.9	0.5	1.8	1.3	1.1	0.4	0
TaPEBP56	0.2	0.2	0.1	0.3	0.3	0.1	0.5	0.1	0.1	0.1	0.1	0.3	0.3	0.3	14.8	15.5
TaPEBP57	0	0	0	0	0	0	0	0	0	0	0	0	0	0	0	0
TaPEBP58	0.4	0.5	0.9	2.2	0	0.5	0.7	1.2	1.3	0.3	0	2.3	1	1.8	2	1.7
TaPEBP59	0	0	0	0	0	0	0	0	0	0	0	0	0	0	0	0
TaPEBP60	0.4	0.2	0.1	0.6	0.4	0.2	0.1	0.1	0	0	0.1	0	0	0	0.2	0.4
TaPEBP61	0	0	0	0	0	0	0	0	0	0	0	0	0	0	0	0
TaPEBP62	0	0.1	0.1	0.1	0	0.1	0.2	0	0	0	0.1	0.2	0.2	0	0.1	0.2
TaPEBP63	0	0	0	0	0	0	0	0	0	0	0	0	0	0.1	0	0
TaPEBP64	0.3	0.5	0.1	0.1	0.4	0	0	0	0	0	0	0	0	0	0.2	0.1
TaPEBP65	0	0	0	0	0	0	0	0	0	0	0	0	0.1	0.1	0	0
TaPEBP66	0	0	0	0	0	0	0	0	0.3	18.1	0	0	0	0.1	0	0.9
TaPEBP67	0	0	0	0	0	0	0	0	0	0	0	0	0.5	2	0	0
TaPEBP68	0	0	0	0	0	0	0	0	0.7	22.2	0	0	0	0.1	0	0.6
TaPEBP69	0	0	0	0	0	0	0	0	0	0	0	0	0	0	0	0
TaPEBP70	0	0	0	0	0	0	0	0	0	0	0	0	0.1	0.8	0	0
TaPEBP71	0	0	0	0	0	0	0	0	0.4	20.2	0	0	0	0.1	0	0.1
TaPEBP72	0.2	0	0	0	0.3	0	0	0	0	0	0	0	0	0	0	0
TaPEBP73	0	0	0	0	0	0	0	0	0	0	0	0	0	0	0	0
TaPEBP74	0	0	0	0	0	0	0	0	0	0	0	0	0	0	0	0
TaPEBP75	0	0	0	0	0	0	0	0	0	0	0	0	0	0	0	0
TaPEBP76	0	0	0	0	0	0	0	0	0	0	0	0	0	0	11	2.1

## Sheet: qPCR data
	Cold			Drought			Flood			Heat			Salt
	Sample Name	Target CT	Actin CT	Sample Name	Target CT	Actin CT	Sample Name	Target CT	Actin CT	Sample Name	Target CT	Actin CT	Sample Name	Target CT	Actin CT
TaPEBP1	Control 0h	25.958	29.18	Control 0h	25.958	29.18	Control 0h	25.958	29.18	Control 0h	25.958	29.18	Control 0h	25.958	29.18
	Control 0h	26.125	29.153	Control 0h	26.125	29.153	Control 0h	26.125	29.153	Control 0h	26.125	29.153	Control 0h	26.125	29.153
	Control 0h	26.168	29.269	Control 0h	26.168	29.269	Control 0h	26.168	29.269	Control 0h	26.168	29.269	Control 0h	26.168	29.269
	Control 3h	25.289	30.213	Control 3h	25.289	30.213	Control 3h	25.289	30.213	Control 3h	25.289	30.213	Control 3h	25.289	30.213
	Control 3h	25.304	30.173	Control 3h	25.304	30.173	Control 3h	25.304	30.173	Control 3h	25.304	30.173	Control 3h	25.304	30.173
	Control 3h	25.492	30.39	Control 3h	25.492	30.39	Control 3h	25.492	30.39	Control 3h	25.492	30.39	Control 3h	25.492	30.39
	Cold 3h	26.276	30.117	Drought 3h	26.002	25.362	Flood 3h	26.439	27.838	Heat 3h	26.473	26.524	Salt 3h	26.027	30.789
	Cold 3h	26.343	30.165	Drought 3h	26.141	25.323	Flood 3h	26.592	27.68	Heat 3h	26.511	26.42	Salt 3h	26.07	30.629
	Cold 3h	26.203	30.002	Drought 3h	26.256	25.335	Flood 3h	26.617	27.929	Heat 3h	26.461	26.57	Salt 3h	26.137	30.542
	Control 6h	25.19	31.144	Control 6h	25.19	31.144	Control 6h	25.19	31.144	Control 6h	25.19	31.144	Control 6h	25.19	31.144
	Control 6h	25.366	31.254	Control 6h	25.366	31.254	Control 6h	25.366	31.254	Control 6h	25.366	31.254	Control 6h	25.366	31.254
	Control 6h	25.225	31.161	Control 6h	25.225	31.161	Control 6h	25.225	31.161	Control 6h	25.225	31.161	Control 6h	25.225	31.161
	Cold 6h	26.931	28.316	Drought 6h	26.256	26.648	Flood 6h	26.57	30.16	Heat 6h	27.224	29.308	Salt 6h	26.25	31.625
	Cold 6h	27.036	28.276	Drought 6h	26.192	26.651	Flood 6h	26.599	30.47	Heat 6h	27.324	29.444	Salt 6h	26.147	31.691
	Cold 6h	26.808	28.123	Drought 6h	26.274	26.625	Flood 6h	26.649	30.356	Heat 6h	27.242	29.418	Salt 6h	26.267	31.865
	Control 12h	25.197	31.546	Control 12h	25.197	31.546	Control 12h	25.197	31.546	Control 12h	25.197	31.546	Control 12h	25.197	31.546
	Control 12h	25.153	31.438	Control 12h	25.153	31.438	Control 12h	25.153	31.438	Control 12h	25.153	31.438	Control 12h	25.153	31.438
	Control 12h	25.285	31.538	Control 12h	25.285	31.538	Control 12h	25.285	31.538	Control 12h	25.285	31.538	Control 12h	25.285	31.538
	Cold 12h	26.733	26.893	Drought 12h	27.49	31.001	Flood 12h	25.74	32.058	Heat 12h	27.628	30.804	Salt 12h	26.131	32.27
	Cold 12h	26.567	26.712	Drought 12h	27.435	31.074	Flood 12h	25.731	31.97	Heat 12h	27.641	30.922	Salt 12h	26.218	32.54
	Cold 12h	26.657	26.732	Drought 12h	27.504	31.082	Flood 12h	25.88	31.976	Heat 12h	27.603	30.677	Salt 12h	26.158	32.207
TaPEBP5	Control 0h	25.97	25.814	Control 0h	25.97	25.814	Control 0h	25.97	25.814	Control 0h	25.97	25.814	Control 0h	25.97	25.814
	Control 0h	26.093	25.777	Control 0h	26.093	25.777	Control 0h	26.093	25.777	Control 0h	26.093	25.777	Control 0h	26.093	25.777
	Control 0h	26.066	25.845	Control 0h	26.066	25.845	Control 0h	26.066	25.845	Control 0h	26.066	25.845	Control 0h	26.066	25.845
	Control 3h	25.242	27.546	Control 3h	25.242	27.546	Control 3h	25.242	27.546	Control 3h	25.242	27.546	Control 3h	25.242	27.546
	Control 3h	25.257	27.471	Control 3h	25.257	27.471	Control 3h	25.257	27.471	Control 3h	25.257	27.471	Control 3h	25.257	27.471
	Control 3h	25.167	27.498	Control 3h	25.167	27.498	Control 3h	25.167	27.498	Control 3h	25.167	27.498	Control 3h	25.167	27.498
	Cold 3h	26.484	26.496	Drought 3h	26.872	26.627	Flood 3h	26.829	26.26	Heat 3h	26.705	24.177	Salt 3h	26.255	24.515
	Cold 3h	26.49	26.524	Drought 3h	26.937	26.675	Flood 3h	26.425	26.149	Heat 3h	26.676	24.182	Salt 3h	26.362	24.42
	Cold 3h	26.589	26.729	Drought 3h	26.988	26.747	Flood 3h	26.858	26.621	Heat 3h	26.685	24.159	Salt 3h	26.201	24.63
	Control 6h	25.401	27.849	Control 6h	25.401	27.849	Control 6h	25.401	27.849	Control 6h	25.401	27.849	Control 6h	25.401	27.849
	Control 6h	25.476	27.961	Control 6h	25.476	27.961	Control 6h	25.476	27.961	Control 6h	25.476	27.961	Control 6h	25.476	27.961
	Control 6h	25.393	27.761	Control 6h	25.393	27.761	Control 6h	25.393	27.761	Control 6h	25.393	27.761	Control 6h	25.393	27.761
	Cold 6h	26.689	24.197	Drought 6h	26.708	28.95	Flood 6h	26.627	27.163	Heat 6h	27.256	25.408	Salt 6h	26.407	27.868
	Cold 6h	26.747	24.001	Drought 6h	26.85	29.215	Flood 6h	26.423	27.217	Heat 6h	27.156	25.544	Salt 6h	26.709	28.029
	Cold 6h	26.62	24.178	Drought 6h	26.895	28.971	Flood 6h	26.433	27.253	Heat 6h	27.471	25.446	Salt 6h	26.711	27.909
	Control 12h	25.683	32.06	Control 12h	25.683	32.06	Control 12h	25.683	32.06	Control 12h	25.683	32.06	Control 12h	25.683	32.06
	Control 12h	25.627	31.747	Control 12h	25.627	31.747	Control 12h	25.627	31.747	Control 12h	25.627	31.747	Control 12h	25.627	31.747
	Control 12h	25.77	31.752	Control 12h	25.77	31.752	Control 12h	25.77	31.752	Control 12h	25.77	31.752	Control 12h	25.77	31.752
	Cold 12h	26.134	21.393	Drought 12h	27.552	31.561	Flood 12h	26.365	28.293	Heat 12h	27.632	27.722	Salt 12h	27.043	28.539
	Cold 12h	26.213	21.313	Drought 12h	27.468	31.221	Flood 12h	26.357	28.344	Heat 12h	27.579	27.419	Salt 12h	26.856	28.455
	Cold 12h	26.367	21.296	Drought 12h	27.798	31.476	Flood 12h	26.53	28.238	Heat 12h	27.611	27.374	Salt 12h	26.97	28.511
TaPEBP9	Control 0h	24.266	27.115	Control 0h	24.266	27.115	Control 0h	24.266	27.115	Control 0h	24.266	27.115	Control 0h	24.266	27.115
	Control 0h	24.066	26.838	Control 0h	24.066	26.838	Control 0h	24.066	26.838	Control 0h	24.066	26.838	Control 0h	24.066	26.838
	Control 0h	23.966	26.738	Control 0h	23.966	26.738	Control 0h	23.966	26.738	Control 0h	23.966	26.738	Control 0h	23.966	26.738
	Control 3h	24.375	27.198	Control 3h	24.375	27.198	Control 3h	24.375	27.198	Control 3h	24.375	27.198	Control 3h	24.375	27.198
	Control 3h	24.628	27.148	Control 3h	24.628	27.148	Control 3h	24.628	27.148	Control 3h	24.628	27.148	Control 3h	24.628	27.148
	Control 3h	24.575	27.262	Control 3h	24.575	27.262	Control 3h	24.575	27.262	Control 3h	24.575	27.262	Control 3h	24.575	27.262
	Cold 3h	25.469	27.548	Drought 3h	24.634	27.28	Flood 3h	25.878	29.449	Heat 3h	25.991	27.49	Salt 3h	25.277	27.647
	Cold 3h	25.544	27.318	Drought 3h	24.856	27.017	Flood 3h	26.176	29.568	Heat 3h	25.795	27.268	Salt 3h	24.915	27.427
	Cold 3h	25.228	27.438	Drought 3h	24.87	26.98	Flood 3h	26.1	29.649	Heat 3h	25.603	27.366	Salt 3h	25.12	27.491
	Control 6h	24.183	27.223	Control 6h	24.183	27.223	Control 6h	24.183	27.223	Control 6h	24.183	27.223	Control 6h	24.183	27.223
	Control 6h	24.233	27.435	Control 6h	24.233	27.435	Control 6h	24.233	27.435	Control 6h	24.233	27.435	Control 6h	24.233	27.435
	Control 6h	24.352	27.342	Control 6h	24.352	27.342	Control 6h	24.352	27.342	Control 6h	24.352	27.342	Control 6h	24.352	27.342
	Cold 6h	25.619	27.502	Drought 6h	25.234	27.061	Flood 6h	26.013	29.971	Heat 6h	25.852	27.193	Salt 6h	25.148	27.022
	Cold 6h	25.531	27.527	Drought 6h	25.197	26.961	Flood 6h	26.054	30.388	Heat 6h	25.818	27.02	Salt 6h	25.154	26.956
	Cold 6h	25.426	27.542	Drought 6h	25.245	26.941	Flood 6h	26.458	30.384	Heat 6h	25.98	27.05	Salt 6h	25.208	26.927
	Control 12h	24.554	27.831	Control 12h	24.554	27.831	Control 12h	24.554	27.831	Control 12h	24.554	27.831	Control 12h	24.554	27.831
	Control 12h	24.446	27.751	Control 12h	24.446	27.751	Control 12h	24.446	27.751	Control 12h	24.446	27.751	Control 12h	24.446	27.751
	Control 12h	24.682	27.833	Control 12h	24.682	27.833	Control 12h	24.682	27.833	Control 12h	24.682	27.833	Control 12h	24.682	27.833
	Cold 12h	25.011	27.27	Drought 12h	25.925	26.086	Flood 12h	25.325	29.972	Heat 12h	26.999	26.321	Salt 12h	25.17	25.245
	Cold 12h	25.19	27.313	Drought 12h	26.125	26.196	Flood 12h	25.518	30.22	Heat 12h	26.896	26.208	Salt 12h	24.987	25.072
	Cold 12h	25.155	27.246	Drought 12h	26.123	26.033	Flood 12h	25.727	30.298	Heat 12h	27.065	26.477	Salt 12h	25.16	25.366
TaPEBP28	Control 0h	24.978	31.046	Control 0h	24.978	31.046	Control 0h	24.978	31.046	Control 0h	24.978	31.046	Control 0h	24.978	31.046
	Control 0h	25.275	30.984	Control 0h	25.275	30.984	Control 0h	25.275	30.984	Control 0h	25.275	30.984	Control 0h	25.275	30.984
	Control 0h	25.098	30.884	Control 0h	25.098	30.884	Control 0h	25.098	30.884	Control 0h	25.098	30.884	Control 0h	25.098	30.884
	Control 3h	24.288	30.367	Control 3h	24.288	30.367	Control 3h	24.288	30.367	Control 3h	24.288	30.367	Control 3h	24.288	30.367
	Control 3h	24.304	30.402	Control 3h	24.304	30.402	Control 3h	24.304	30.402	Control 3h	24.304	30.402	Control 3h	24.304	30.402
	Control 3h	24.231	30.483	Control 3h	24.231	30.483	Control 3h	24.231	30.483	Control 3h	24.231	30.483	Control 3h	24.231	30.483
	Cold 3h	25.224	31.189	Drought 3h	25.333	31.155	Flood 3h	25.949	31.369	Heat 3h	25.626	30.977	Salt 3h	24.872	30.802
	Cold 3h	25.348	31.561	Drought 3h	25.112	30.987	Flood 3h	25.995	31.267	Heat 3h	25.764	31.144	Salt 3h	24.743	30.799
	Cold 3h	25.327	31.461	Drought 3h	25.233	31.097	Flood 3h	25.895	31.2	Heat 3h	25.662	31.034	Salt 3h	24.954	30.97
	Control 6h	24.217	30.674	Control 6h	24.217	30.674	Control 6h	24.217	30.674	Control 6h	24.217	30.674	Control 6h	24.217	30.674
	Control 6h	24.202	30.66	Control 6h	24.202	30.66	Control 6h	24.202	30.66	Control 6h	24.202	30.66	Control 6h	24.202	30.66
	Control 6h	24.306	30.686	Control 6h	24.306	30.686	Control 6h	24.306	30.686	Control 6h	24.306	30.686	Control 6h	24.306	30.686
	Cold 6h	25.26	29.426	Drought 6h	25.251	31.077	Flood 6h	25.85	31.874	Heat 6h	25.789	30.036	Salt 6h	25.514	31.992
	Cold 6h	25.201	29.456	Drought 6h	25.444	31.131	Flood 6h	25.811	31.532	Heat 6h	25.943	30.082	Salt 6h	25.383	32.06
	Cold 6h	25.267	29.525	Drought 6h	25.362	31.051	Flood 6h	25.883	31.698	Heat 6h	25.989	30.98	Salt 6h	25.462	32.101
	Control 12h	24.56	31.496	Control 12h	24.56	31.496	Control 12h	24.56	31.496	Control 12h	24.56	31.496	Control 12h	24.56	31.496
	Control 12h	24.225	31.563	Control 12h	24.225	31.563	Control 12h	24.225	31.563	Control 12h	24.225	31.563	Control 12h	24.225	31.563
	Control 12h	24.312	31.803	Control 12h	24.312	31.803	Control 12h	24.312	31.803	Control 12h	24.312	31.803	Control 12h	24.312	31.803
	Cold 12h	25.144	29.759	Drought 12h	25.643	31.844	Flood 12h	26.103	36.592	Heat 12h	26.605	29.003	Salt 12h	25.527	33.518
	Cold 12h	25.2	30.276	Drought 12h	25.563	32.268	Flood 12h	26.102	36.692	Heat 12h	26.24	29.069	Salt 12h	25.133	33.719
	Cold 12h	25.005	30.173	Drought 12h	25.609	32.068	Flood 12h	26.142	36.589	Heat 12h	26.226	29.035	Salt 12h	25.045	33.819
TaPEBP50	Control 0h	25.473	31.598	Control 0h	25.473	31.598	Control 0h	25.473	31.598	Control 0h	25.473	31.598	Control 0h	25.473	31.598
	Control 0h	25.513	31.498	Control 0h	25.513	31.498	Control 0h	25.513	31.498	Control 0h	25.513	31.498	Control 0h	25.513	31.498
	Control 0h	25.255	31.574	Control 0h	25.255	31.574	Control 0h	25.255	31.574	Control 0h	25.255	31.574	Control 0h	25.255	31.574
	Control 3h	24.161	32.595	Control 3h	24.161	32.595	Control 3h	24.161	32.595	Control 3h	24.161	32.595	Control 3h	24.161	32.595
	Control 3h	24.122	32.511	Control 3h	24.122	32.511	Control 3h	24.122	32.511	Control 3h	24.122	32.511	Control 3h	24.122	32.511
	Control 3h	24.067	32.711	Control 3h	24.067	32.711	Control 3h	24.067	32.711	Control 3h	24.067	32.711	Control 3h	24.067	32.711
	Cold 3h	25.461	32.441	Drought 3h	25.46	29.938	Flood 3h	25.779	28.687	Heat 3h	25.994	33.551	Salt 3h	25.24	34.77
	Cold 3h	25.425	32.441	Drought 3h	25.484	30.033	Flood 3h	25.539	28.477	Heat 3h	26.101	33.568	Salt 3h	25.088	34.729
	Cold 3h	25.482	32.541	Drought 3h	25.487	30.133	Flood 3h	25.689	28.669	Heat 3h	26.085	33.668	Salt 3h	25.366	34.781
	Control 6h	24.527	33.845	Control 6h	24.527	33.845	Control 6h	24.527	33.845	Control 6h	24.527	33.845	Control 6h	24.527	33.845
	Control 6h	24.673	33.738	Control 6h	24.673	33.738	Control 6h	24.673	33.738	Control 6h	24.673	33.738	Control 6h	24.673	33.738
	Control 6h	24.385	33.538	Control 6h	24.385	33.538	Control 6h	24.385	33.538	Control 6h	24.385	33.538	Control 6h	24.385	33.538
	Cold 6h	25.851	32.477	Drought 6h	25.554	31.975	Flood 6h	25.497	30	Heat 6h	26.52	33.333	Salt 6h	25.672	33.676
	Cold 6h	25.676	32.209	Drought 6h	25.563	31.625	Flood 6h	25.644	29.971	Heat 6h	26.558	33.124	Salt 6h	25.725	33.586
	Cold 6h	25.688	32.219	Drought 6h	25.288	31.525	Flood 6h	25.444	30.032	Heat 6h	26.54	33.224	Salt 6h	25.676	33.714
	Control 12h	24.712	34.487	Control 12h	24.712	34.487	Control 12h	24.712	34.487	Control 12h	24.712	34.487	Control 12h	24.712	34.487
	Control 12h	24.633	34.387	Control 12h	24.633	34.387	Control 12h	24.633	34.387	Control 12h	24.633	34.387	Control 12h	24.633	34.387
	Control 12h	24.612	34.478	Control 12h	24.612	34.478	Control 12h	24.612	34.478	Control 12h	24.612	34.478	Control 12h	24.612	34.478
	Cold 12h	25.472	31.092	Drought 12h	25.913	34.028	Flood 12h	25.631	35.781	Heat 12h	26.304	33.8	Salt 12h	25.496	33.268
	Cold 12h	25.279	31.049	Drought 12h	25.987	33.955	Flood 12h	25.86	35.848	Heat 12h	26.201	33.6	Salt 12h	25.364	33.368
	Cold 12h	25.379	31.109	Drought 12h	26.084	33.986	Flood 12h	25.687	35.751	Heat 12h	26.445	33.825	Salt 12h	25.547	33.416
TaPEBP66	Control 0h	25.275	33.559	Control 0h	25.275	33.559	Control 0h	25.275	33.559	Control 0h	25.275	33.559	Control 0h	25.275	33.559
	Control 0h	25.356	33.449	Control 0h	25.356	33.449	Control 0h	25.356	33.449	Control 0h	25.356	33.449	Control 0h	25.356	33.449
	Control 0h	25.28	33.476	Control 0h	25.28	33.476	Control 0h	25.28	33.476	Control 0h	25.28	33.476	Control 0h	25.28	33.476
	Control 3h	24.61	34.579	Control 3h	24.61	34.579	Control 3h	24.61	34.579	Control 3h	24.61	34.579	Control 3h	24.61	34.579
	Control 3h	24.586	34.75	Control 3h	24.586	34.75	Control 3h	24.586	34.75	Control 3h	24.586	34.75	Control 3h	24.586	34.75
	Control 3h	24.497	34.789	Control 3h	24.497	34.789	Control 3h	24.497	34.789	Control 3h	24.497	34.789	Control 3h	24.497	34.789
	Cold 3h	25.666	30.699	Drought 3h	25.398	33.123	Flood 3h	25.247	30.275	Heat 3h	26.209	34.925	Salt 3h	25.341	36.519
	Cold 3h	25.667	30.999	Drought 3h	25.255	33.361	Flood 3h	25.314	30.415	Heat 3h	26.301	35.076	Salt 3h	24.951	36.419
	Cold 3h	25.466	30.89	Drought 3h	25.314	33.561	Flood 3h	25.033	30.35	Heat 3h	26.131	35.176	Salt 3h	25.089	36.428
	Control 6h	24.554	32.654	Control 6h	24.554	32.654	Control 6h	24.554	32.654	Control 6h	24.554	32.654	Control 6h	24.554	32.654
	Control 6h	24.493	32.554	Control 6h	24.493	32.554	Control 6h	24.493	32.554	Control 6h	24.493	32.554	Control 6h	24.493	32.554
	Control 6h	24.541	32.642	Control 6h	24.541	32.642	Control 6h	24.541	32.642	Control 6h	24.541	32.642	Control 6h	24.541	32.642
	Cold 6h	25.903	33.306	Drought 6h	25.604	34.072	Flood 6h	25.521	30.181	Heat 6h	26.29	32.106	Salt 6h	25.543	34.519
	Cold 6h	25.868	33.506	Drought 6h	25.661	34.127	Flood 6h	25.63	30.125	Heat 6h	26.369	32.08	Salt 6h	25.624	34.521
	Cold 6h	25.89	33.318	Drought 6h	25.805	34.012	Flood 6h	25.452	30.077	Heat 6h	26.346	32.18	Salt 6h	25.595	34.613
	Control 12h	24.807	32.583	Control 12h	24.807	32.583	Control 12h	24.807	32.583	Control 12h	24.807	32.583	Control 12h	24.807	32.583
	Control 12h	24.718	32.783	Control 12h	24.718	32.783	Control 12h	24.718	32.783	Control 12h	24.718	32.783	Control 12h	24.718	32.783
	Control 12h	24.967	32.893	Control 12h	24.967	32.893	Control 12h	24.967	32.893	Control 12h	24.967	32.893	Control 12h	24.967	32.893
	Cold 12h	25.229	38.77	Drought 12h	26.029	33.892	Flood 12h	25.559	33.85	Heat 12h	26.753	31.251	Salt 12h	25.516	30.801
	Cold 12h	25.493	38.88	Drought 12h	26.06	33.984	Flood 12h	25.426	33.78	Heat 12h	26.644	31.244	Salt 12h	25.34	30.912
	Cold 12h	25.473	38.781	Drought 12h	26.141	33.889	Flood 12h	26.395	33.703	Heat 12h	26.961	31.432	Salt 12h	25.459	30.912
TaPEBP69	Control 0h	25.308	35.762	Control 0h	25.308	35.762	Control 0h	25.308	35.762	Control 0h	25.308	35.762	Control 0h	25.308	35.762
	Control 0h	25.372	35.762	Control 0h	25.372	35.762	Control 0h	25.372	35.762	Control 0h	25.372	35.762	Control 0h	25.372	35.762
	Control 0h	25.383	35.697	Control 0h	25.383	35.697	Control 0h	25.383	35.697	Control 0h	25.383	35.697	Control 0h	25.383	35.697
	Control 3h	24.214	34.018	Control 3h	24.214	34.018	Control 3h	24.214	34.018	Control 3h	24.214	34.018	Control 3h	24.214	34.018
	Control 3h	24.184	34.246	Control 3h	24.184	34.246	Control 3h	24.184	34.246	Control 3h	24.184	34.246	Control 3h	24.184	34.246
	Control 3h	24.19	34.146	Control 3h	24.19	34.146	Control 3h	24.19	34.146	Control 3h	24.19	34.146	Control 3h	24.19	34.146
	Cold 3h	25.32	34.176	Drought 3h	25.153	35.207	Flood 3h	26.116	34.286	Heat 3h	25.885	34.6	Salt 3h	25.042	32.825
	Cold 3h	25.231	34.44	Drought 3h	25.026	35.478	Flood 3h	25.906	34.106	Heat 3h	25.906	34.578	Salt 3h	24.828	32.924
	Cold 3h	25.321	34.234	Drought 3h	25.132	35.478	Flood 3h	25.898	34.106	Heat 3h	25.931	34.784	Salt 3h	24.974	32.924
	Control 6h	24.199	33.876	Control 6h	24.199	33.876	Control 6h	24.199	33.876	Control 6h	24.199	33.876	Control 6h	24.199	33.876
	Control 6h	23.907	33.966	Control 6h	23.907	33.966	Control 6h	23.907	33.966	Control 6h	23.907	33.966	Control 6h	23.907	33.966
	Control 6h	24.428	33.896	Control 6h	24.428	33.896	Control 6h	24.428	33.896	Control 6h	24.428	33.896	Control 6h	24.428	33.896
	Cold 6h	25.875	32.903	Drought 6h	25.524	33.786	Flood 6h	25.761	32.096	Heat 6h	26.126	32.378	Salt 6h	25.253	34.119
	Cold 6h	25.562	32.983	Drought 6h	25.518	33.896	Flood 6h	26.022	32.483	Heat 6h	26.095	32.626	Salt 6h	25.388	34.286
	Cold 6h	25.882	32.754	Drought 6h	25.523	33.575	Flood 6h	26.214	32.256	Heat 6h	26.083	32.226	Salt 6h	25.421	33.995
	Control 12h	24.733	33.583	Control 12h	24.733	33.583	Control 12h	24.733	33.583	Control 12h	24.733	33.583	Control 12h	24.733	33.583
	Control 12h	24.804	33.555	Control 12h	24.804	33.555	Control 12h	24.804	33.555	Control 12h	24.804	33.555	Control 12h	24.804	33.555
	Control 12h	24.855	33.365	Control 12h	24.855	33.365	Control 12h	24.855	33.365	Control 12h	24.855	33.365	Control 12h	24.855	33.365
	Cold 12h	24.906	33.686	Drought 12h	25.605	32.879	Flood 12h	25.253	36.083	Heat 12h	26.648	32.342	Salt 12h	25.414	33.955
	Cold 12h	25.368	33.971	Drought 12h	25.987	32.756	Flood 12h	25.452	36.208	Heat 12h	26.524	32.354	Salt 12h	25.434	33.819
	Cold 12h	25.297	33.747	Drought 12h	25.998	32.695	Flood 12h	25.366	36.328	Heat 12h	26.448	32.166	Salt 12h	25.361	34.091
