# Supplementary material for: Genome-wide member identification, phylogeny and expression analysis of PEBP gene family in wheat and its progenitors
Source: PeerJ journal article supplement (doi:10.7717/peerj.10483), 2020-12-15

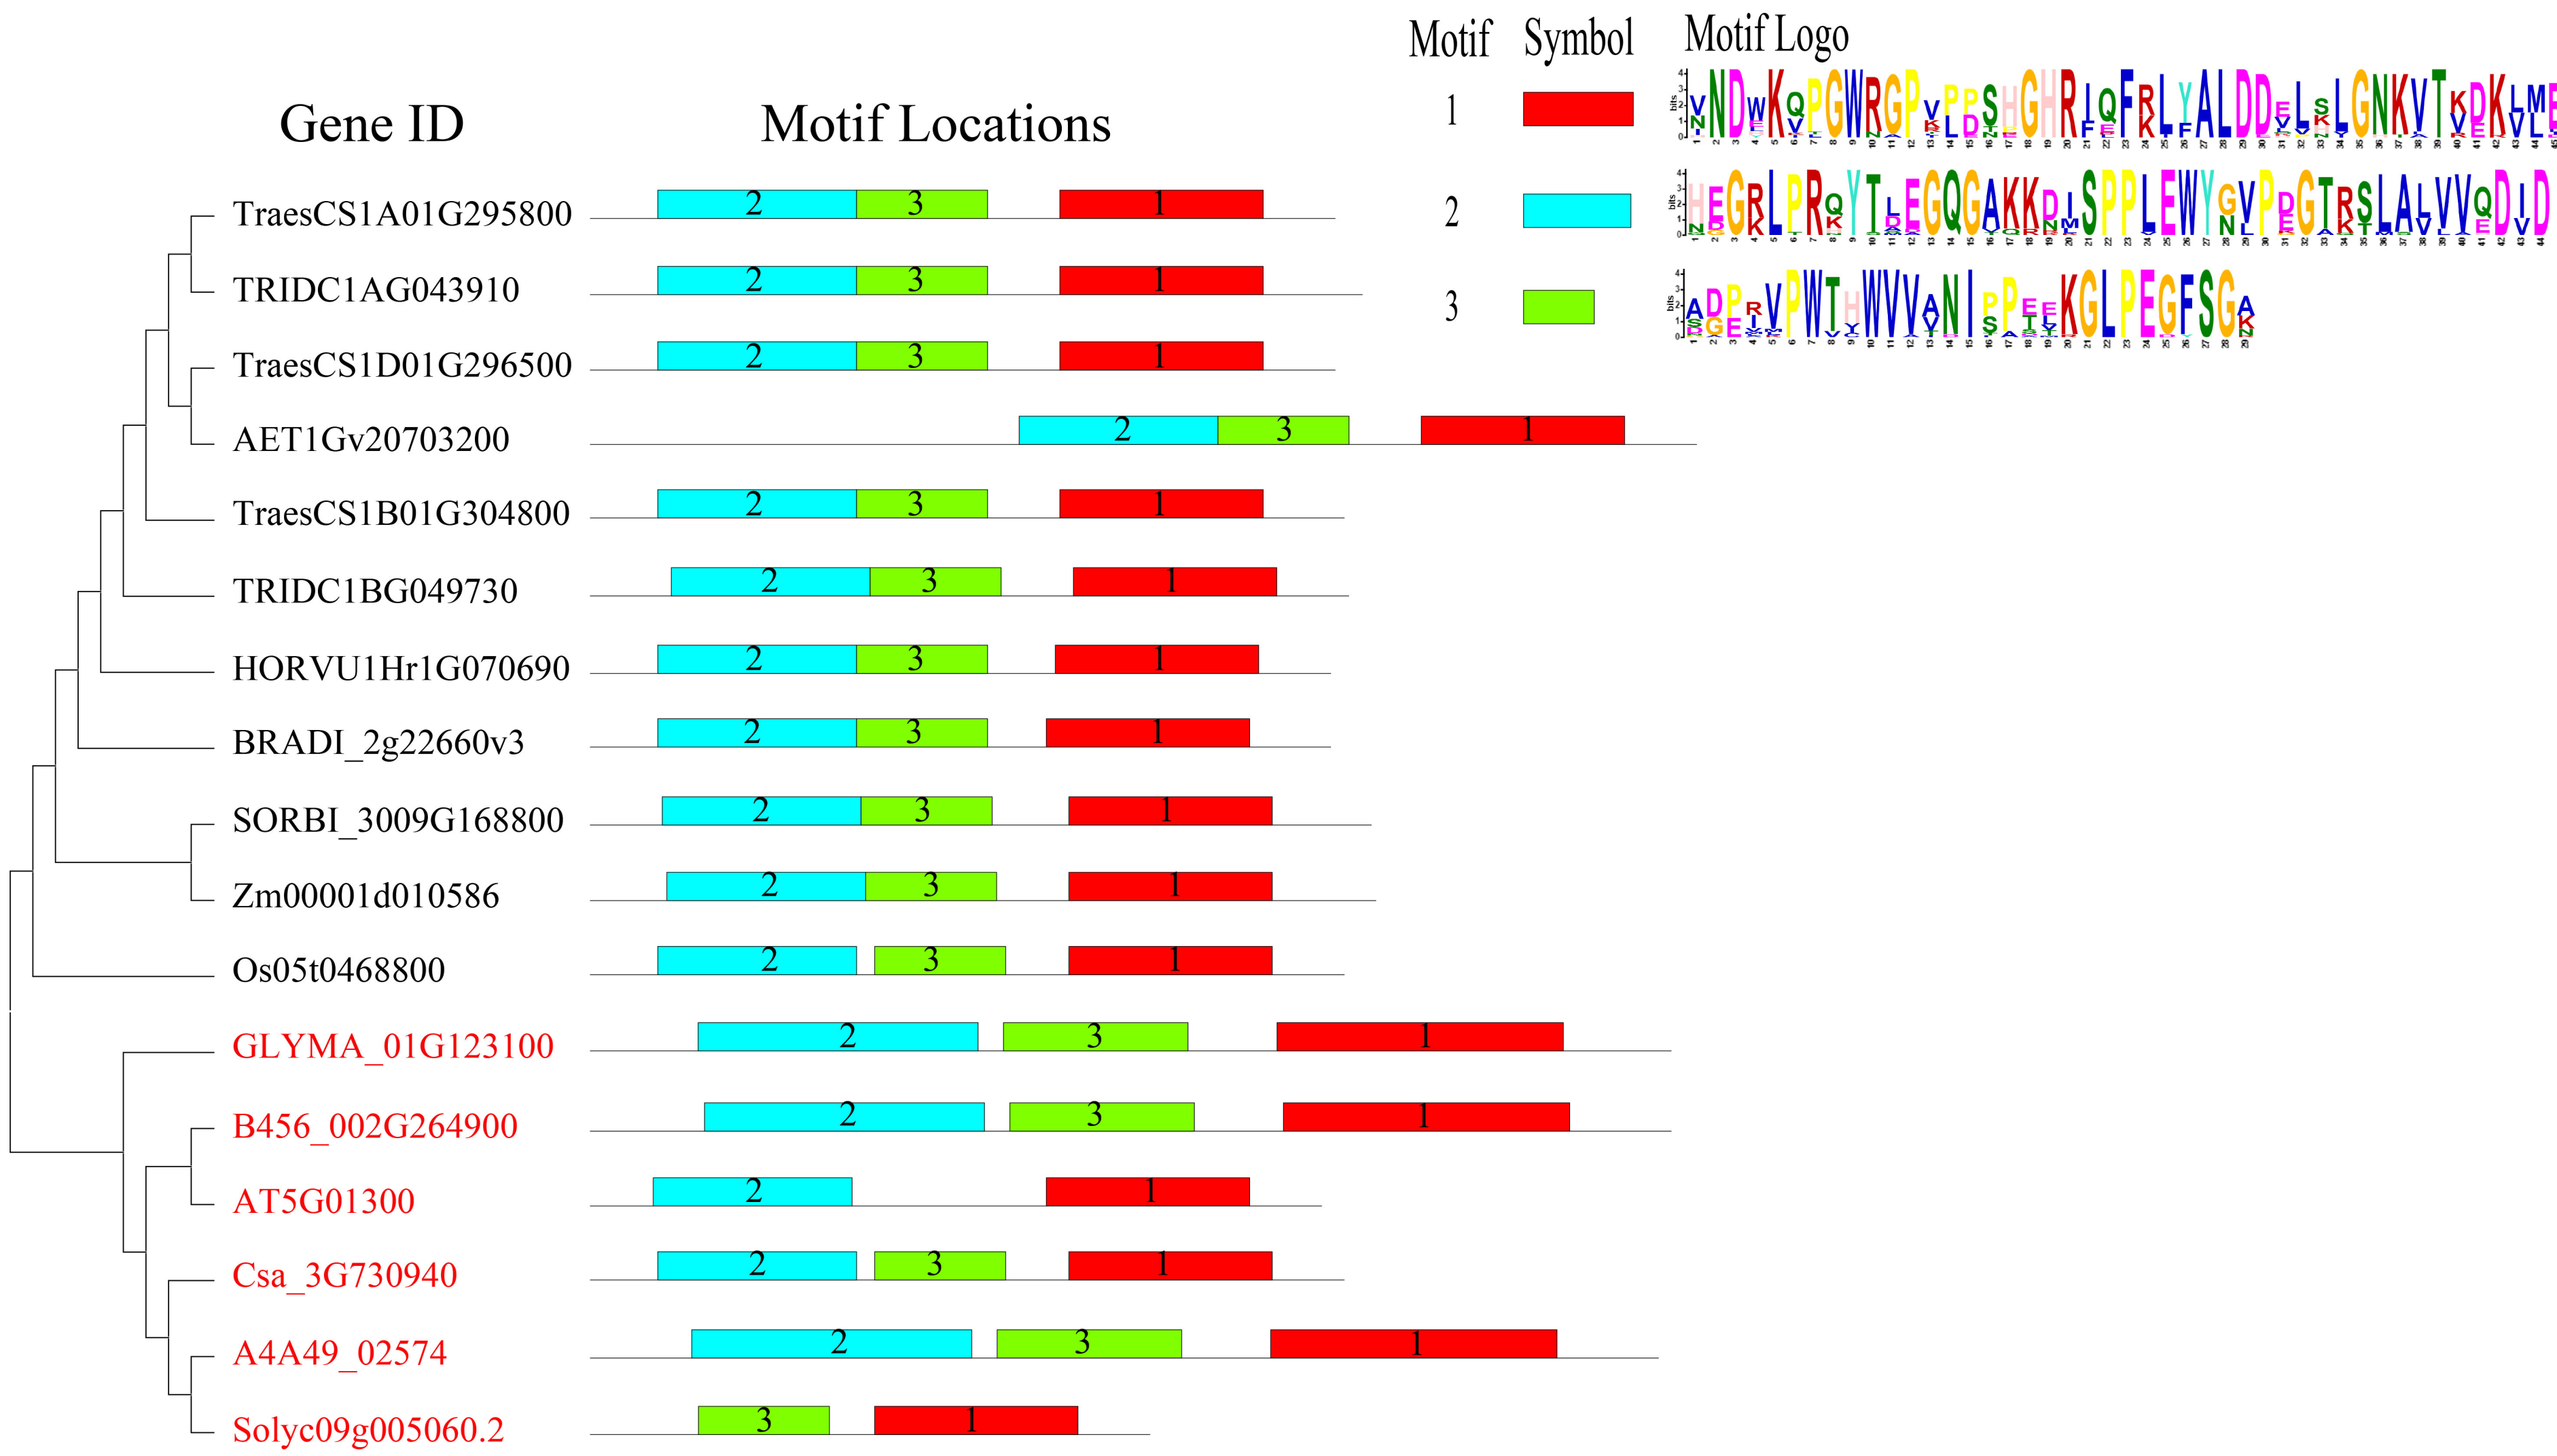

Supplement: Supplemental_Fig._S1.pdf [file Supplemental_Fig._S1.pdf]
